# Supplementary material
Source: PubMed Central journal article supplement (PMC6436647)

# Fig. S1

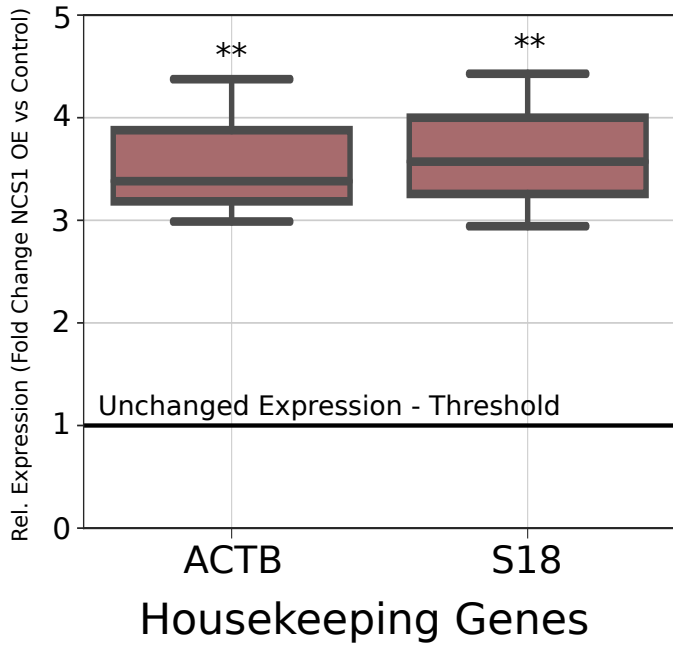

# Fig. S2

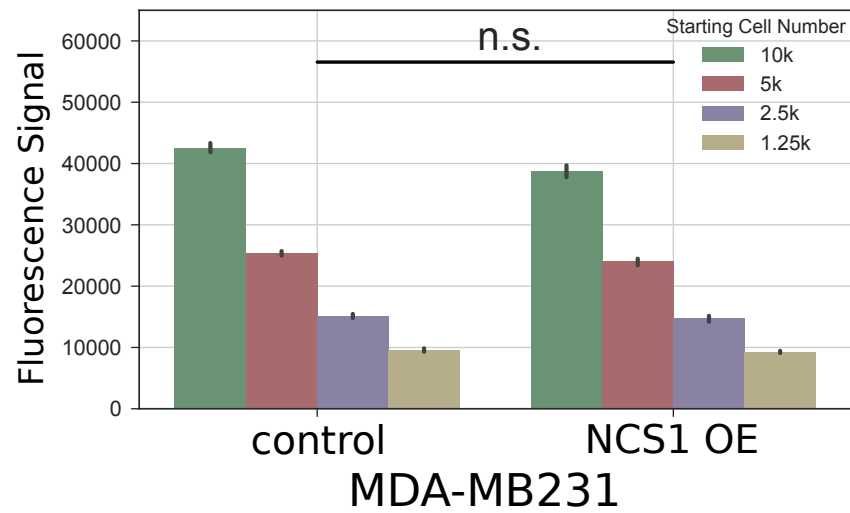

# Fig. S3

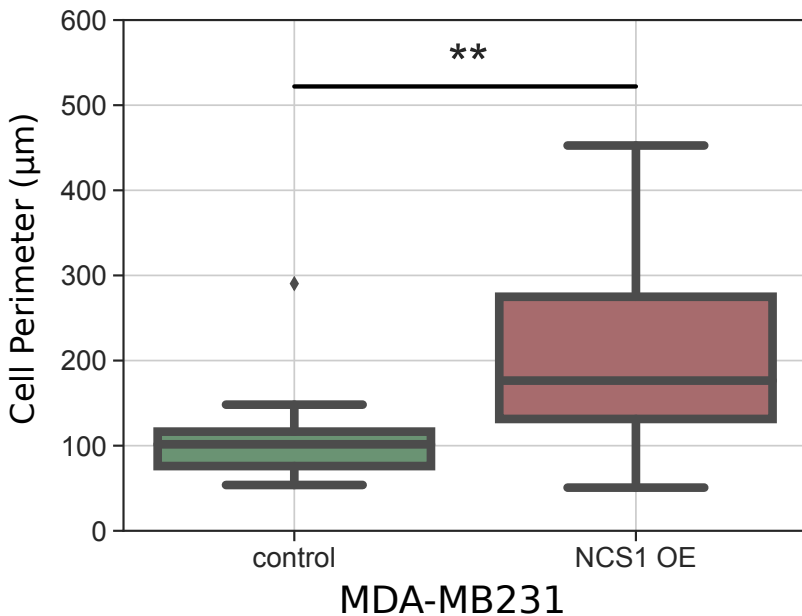

Supplement: fj.201802004R.sf1.pdf [file fj.201802004R.sf1.pdf]

**Fig. S4**

**MDA-MB231  
control**

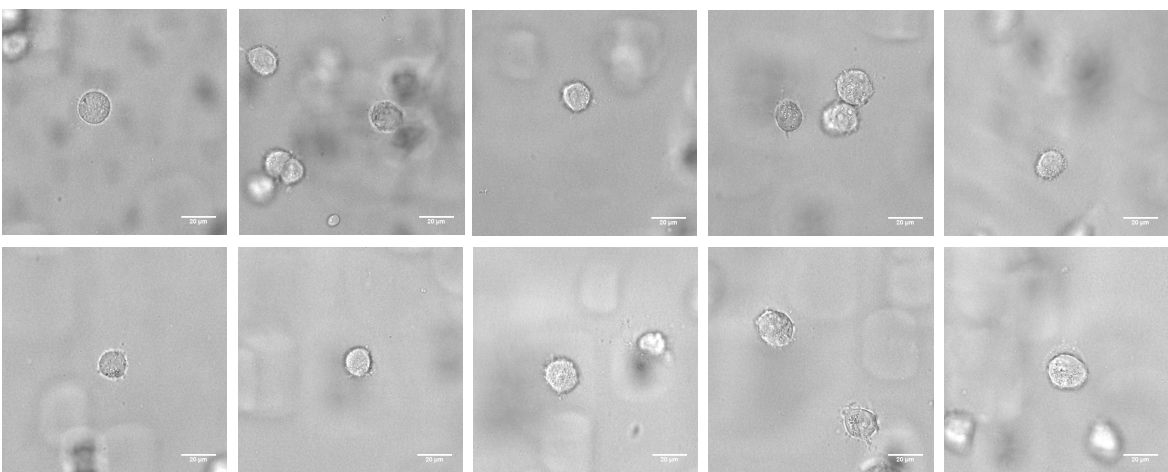

**MDA-MB231  
NCS1 OE**

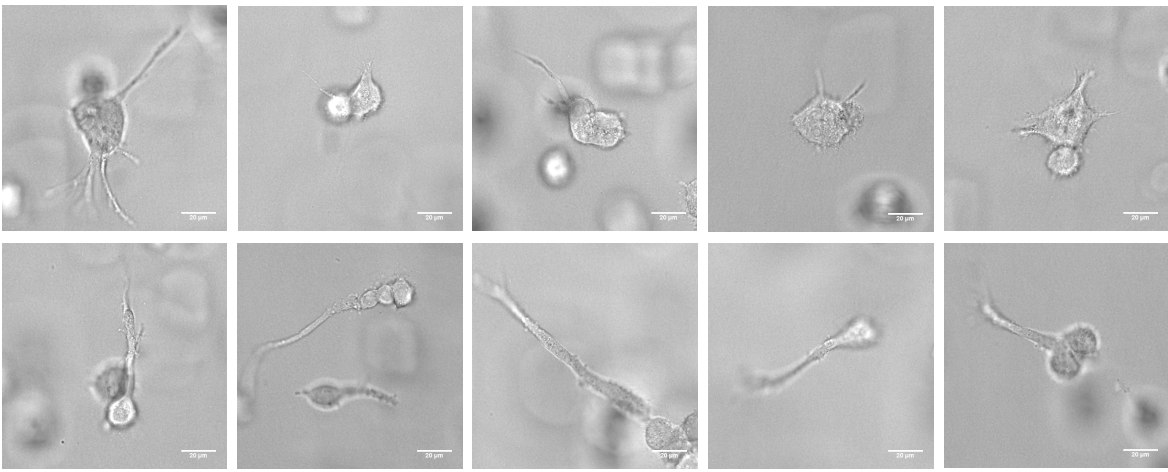

Supplement: fj.201802004R.sf2.pdf [file fj.201802004R.sf2.pdf]

# Fig. S5

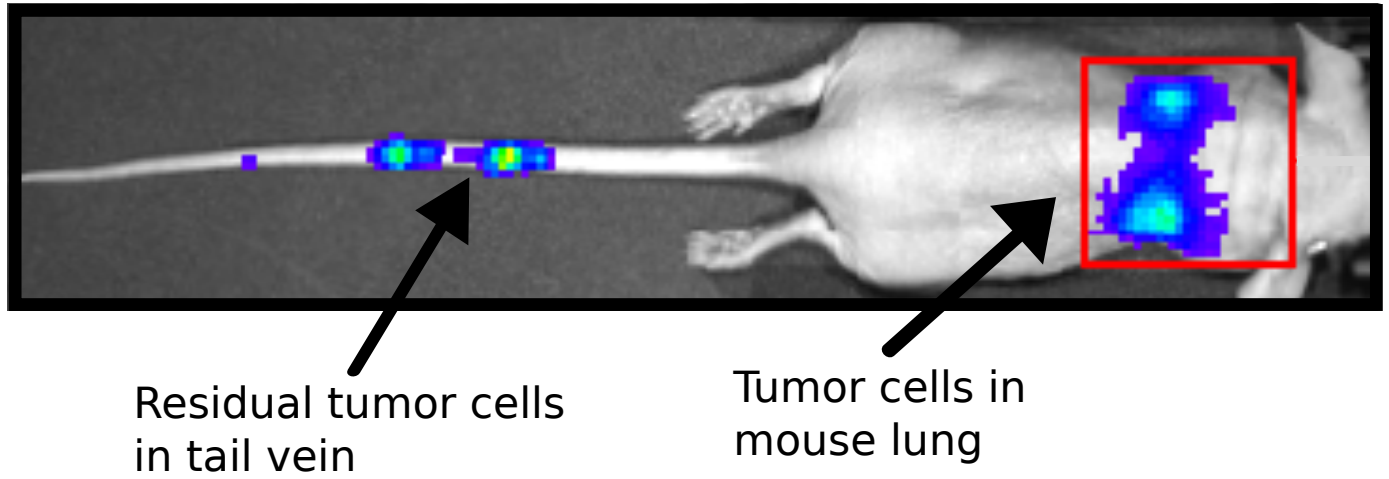

# Fig. S6

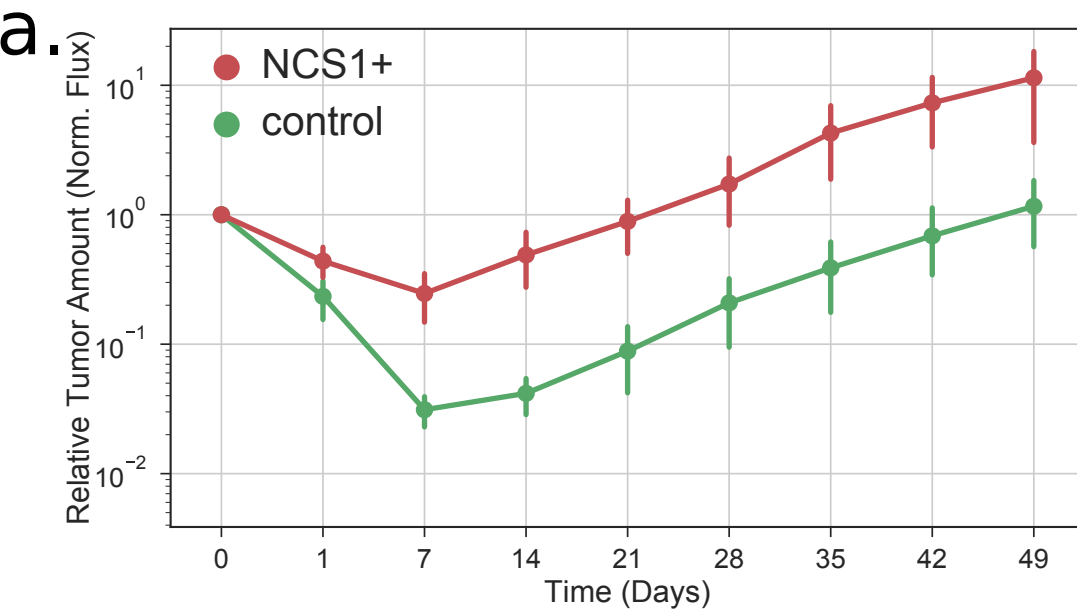

# Fig. S7

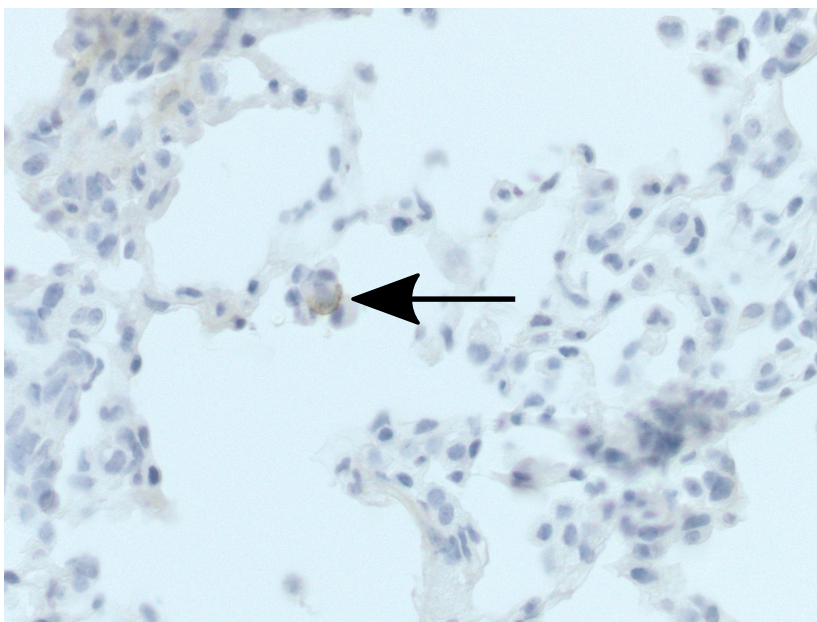

# Fig. S8

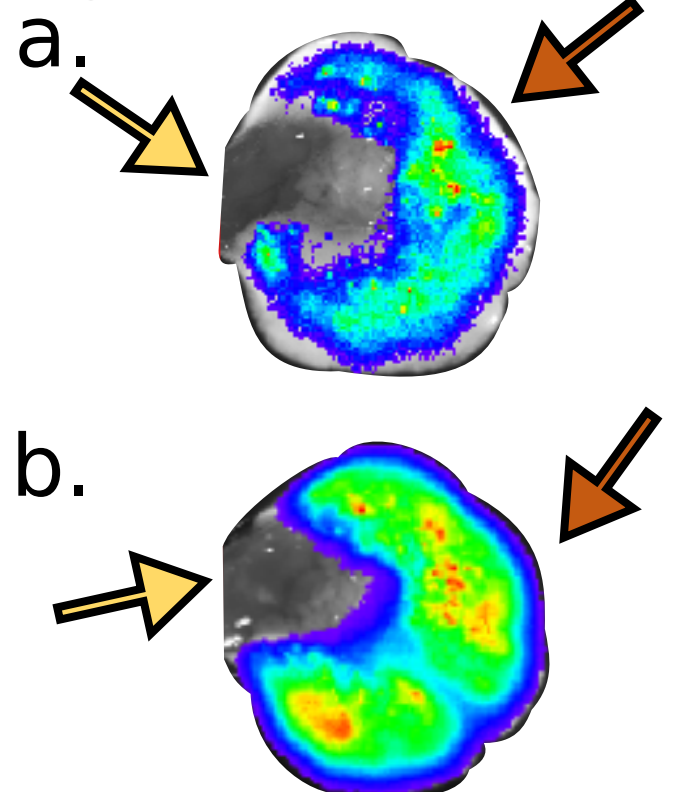

Supplement: fj.201802004R.sf3.pdf [file fj.201802004R.sf3.pdf]
